## RESEARCH ARTICLE

# Cultural landscape perception of the Chinese traditional settlement: Based on tourists' online comments

Jingjing Zhou<sup>1</sup>, Shanshan Wu<sup>1</sup>, Xiaojing Wu<sup>2</sup>, Xiumin Xia<sup>1\*</sup><sup>1</sup> College of Design, Ningbo Tech University, Ningbo, Zhejiang, China, <sup>2</sup> College of Architecture and Urban Planning, Guizhou University, Guiyang, Guizhou, China\* [13736066455@sohu.com](mailto:13736066455@sohu.com)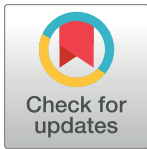

## Abstract

The cultural landscape in traditional settlements is an important historical and cultural resource created by human beings in the process of historical evolution, and is an important resource for the development of traditional settlement tourism. This paper selected 21 representative traditional settlements for research using online comments from tourists as data and content analytical methods including high-frequency vocabulary, semantic networks and emotional attitudes to explore the public perspective on the connotations of cultural landscape features in traditional settlements. There are four major findings, showing first that the cultural landscape of traditional settlements contains three core elements. Second, the semantic network relationships of the core elements show a significant central–edge tendency; and third, the emotional perception of cultural landscapes in traditional settlements is generally positive, and there is no significant difference emotionally between each core element. Last, the public's perception of the cultural connotations of the landscape is seriously insufficient. Based on the research results, planning suggestions and countermeasures for the conservation and utilization of cultural landscapes in traditional settlements are proposed.

## OPEN ACCESS

**Citation:** Zhou J, Wu S, Wu X, Xia X (2023) Cultural landscape perception of the Chinese traditional settlement: Based on tourists' online comments. PLoS ONE 18(4): e0283335. <https://doi.org/10.1371/journal.pone.0283335>

**Editor:** Jun Yang, Northeastern University (Shenyang China), CHINA

**Received:** November 24, 2022

**Accepted:** March 7, 2023

**Published:** April 13, 2023

**Copyright:** © 2023 Zhou et al. This is an open access article distributed under the terms of the [Creative Commons Attribution License](https://creativecommons.org/licenses/by/4.0/), which permits unrestricted use, distribution, and reproduction in any medium, provided the original author and source are credited.

**Data Availability Statement:** All relevant data are within the paper and its [Supporting Information](#) files.

**Funding:** This research was funded by Scientific Research and Creation Project of Zhejiang Provincial Department of Culture and Tourism (Grant No. 2022KYY009), Major special projects of Ningbo Science and Technology Bureau (Grant No. 20211ZDYF020034), Natural Science Foundation of Zhejiang Province (Grant No. LQ19E080010), and Humanities and Social Science Project of the Ministry of Education (Grant No. 19YJC760122).

## 1 Introduction

Traditional settlements have experienced a long historical evolution and contain rich historical information and cultural resources. The important cultural landscape created by human beings in the course of their historical evolution is an important subject of study [1]. According to the classification of cultural landscapes in the “Operational Guidelines for the Implementation of Convention Concerning the Protection of the World Cultural and Natural Heritage”, traditional settlements belong to the continuation category under the classification of organically evolving landscapes. A cultural settlement landscape is defined as a group of historical buildings, structures together with the surrounding environment and the spontaneous growth of the building community. The settlement landscape continues social functions and shows the evolution and development of history [2]. It is an important relic of traditional

The funders had no role in the study design, data collection and analysis, decision to publish, or preparation of the manuscript.

**Competing interests:** The authors declare no conflict of interest.

culture, an invaluable measure of heritage left to the contemporary generation by our ancestors, and a nonrenewable cultural resource with high historical, cultural, scientific and artistic values.

With the rapid advance of industrialization and urbanization, traditional settlements that rely on traditional lifestyles and methods of production have gradually lost their foundation for survival and encountered difficulties in development [3]. The decline in traditional settlements is increasingly aggravated [4], which raises the prospects of the destruction of material culture such as architecture and living environments [5], the decline in the intangible culture of villages [6,7], and the conflict between the protection and utilization of the cultural landscape [8,9]. As one of the primary forms of protection for living heritage, tourism development has become a way to reverse the declining fate of many traditional settlements [10–13]. In the development of the cultural tourism of traditional settlements, the cultural landscape has become an important resource [14,15]. When the cultural landscape of traditional settlements plays a leading role in cultural tourism development, the landscape can effectively lead and promote the protection and rebirth of traditional settlements [16].

Most of the studies on traditional settlement cultural landscapes have been limited to the scope of cultural geography. The contents of these studies have included the characteristics, historical evolution and formation mechanism of cultural landscapes. However, with the development of traditional settlement tourism, the cultural landscape has become an important tourism resource and an important planning object in traditional settlement tourism planning. Therefore, it is necessary to study the traditional settlement cultural landscape from the interdisciplinary perspective of tourism, communication and planning. Against this research background, this paper focuses on the analysis of the types, characteristics and cultural connotations of the traditional settlement cultural landscape from the perspective of tourists. The research conclusion reveals the multi-dimensional characteristics and relationship of traditional settlement cultural landscapes from the perspective of tourists and provides decision-making suggestions for the protection and utilization of traditional settlement cultural landscape [17].

Based on the above research motivation, in terms of research methods, this paper uses online comments left by tourists as research data. The data come from the subjective evaluations of tourists and objectively reflect the cultural landscape characteristics perceived by tourists. Through preliminary data processing, the comments related to cultural landscape are extracted for content analysis, including high-frequency vocabulary, semantic network and emotional tendencies.

## 2 Review

### 2.1 Research on perceptions of traditional settlement cultural landscapes

According to the landscape intertextuality theory of new cultural geography, any scholar's understanding of cultural landscape cannot be completely consistent with the meaning of the builder [18]. Cultural landscape perception continues the research paradigm and methods of landscape perception, widely uses psychological methods, and focuses on the use of empirical research methods such as experiments and tests to collect quantitative data [19–21]. The results have strong objectivity and operability [22]. According to the empirical research on cultural landscape perception, landscapes can be divided into scenes, including cultural landscape real scene perception, cultural landscape photo perception and cultural landscape 3D virtual scene perception. Cultural landscape reality and cultural landscape photos are common perceptual scene settings [23,24]. In recent years, with the development of SD and VR technology, many scholars have replaced landscape reality with virtual scenes. Compared with landscape

reality, photos and virtual scenes have the advantages for researchers of easy measurements of eye movements, easy access to data, and accurate screening of samples of perceptual objects and subjects [25]. However, in perceiving photos and VR virtual scenes, except for the movement of the eyes, the perceiver does not actually produce physical movement with other parts of the body. Embodied cognition theory suggests that there is a strong connection between human physiological experience and psychological state [26,27]. People's perceptual ability, such as the breadth, threshold and limit of perception, is determined by the physical properties of the body. In addition, people use all five senses to receive information from the landscape environment, while photos and virtual scenes cannot mobilize all of these five senses. Therefore, the difference between the perception of photos and VR scenes and the perception of landscape reality is obvious.

The data acquisition methods for empirical research on cultural landscape perception include questionnaire interviews [28,29], cognitive maps [30,31] and network data mining [32]. In the questionnaire and interview surveys, the data were collected and collated using the SD semantic difference method, Q method, metaphor extraction technology and other quantitative and qualitative methods. During data analysis, mathematical statistical tools such as principal component analysis, factor analysis, cluster analysis, multiple regression and structural equation modeling (SEM) are used for quantitative research [33].

In terms of research results on the perception of the cultural landscape of the traditional settlement, Daugstad started with the rural cultural landscape in Norway and investigated three-dimensional coordination related to the landscape: values and requirements, the method of experience, and future development prospects. The research shows that although participants hold different positions and attitudes, they all unite to pay attention to landscape changes and hope to protect traditional food and local agricultural products [34]. Stephenson believed that the information provided by recent planning theory and practice gave less attention to the significance and value of the cultural landscape. This research aims to develop a conceptual framework that integrates landscape planning elements and the perception of community cultural values to help understand the multicultural value of landscapes [35]. Li used GIS spatial analysis and participatory mapping to discuss the differences in type and spatial characteristics in resident perception of traditional village landscape values [36]. Chen used expert evaluation and public evaluation to conduct perception and preference studies on traditional village landscapes [37].

With the development of traditional settlement tourism, tourists have become an important new subject in the study of cultural landscapes in traditional tourist settlements are perceived. The perception of the cultural landscape in traditional settlements by tourists, as well as the difference from perception by other subjects (local residents, local governments and investors), has become a hot topic for scholars to study. Beeho conducted an ASEB semigrad analysis of tourists' experience in New Lanark Village, a world cultural heritage site in the United Kingdom, by using in-depth interviews with tourists and found that the main experience of tourists is to enjoy historical and cultural education and benefit from learning [38]. Zeppel's empirical analysis of an indigenous village in Canada found that tourists' understanding of the history of traditional villages and contact with first nations were important factors affecting their cultural experience. It is proposed that the interpretation of indigenous culture should be key to improving the attraction of local indigenous villages. Traditional village tourism itself is driven by a certain motivation to seek difference, but different tourists pursue this experience of difference in different ways [39]. Lin studied the interaction between the perception of traditional village landscape contexts and tourist behavior [40]. Yang took the Longji Terrace in Guangxi as a case study, using literature analysis, online text analysis, rooting theory, etc., to study tourists' perceptions through high-frequency vocabulary, perception category construction,

emotion analysis, etc., and discussed tourists' perception of the Longji Terrace agricultural cultural landscape, landscape perception differences, and insufficient tourism development, etc. [41]. Yuan tried to collect feedback on tourists' visual perception of the cultural landscape of the ancient city of Pingyao by means of visual information extraction and other methods and used color geography, color psychology and other related theories and methods to extract and

**Table 1. Cultural landscapes of traditional settlements and constituent elements.**

| Scholars  | Constituent Type                                                                                      | Constituent Elements                                                                                                                                                                                                                                                                                                                                                                                                                                                                                                                                                                                                                                                                   |
|-----------|-------------------------------------------------------------------------------------------------------|----------------------------------------------------------------------------------------------------------------------------------------------------------------------------------------------------------------------------------------------------------------------------------------------------------------------------------------------------------------------------------------------------------------------------------------------------------------------------------------------------------------------------------------------------------------------------------------------------------------------------------------------------------------------------------------|
| Zhao [43] | <b>Material landscape</b><br><b>Nonmaterial landscape</b>                                             | · <b>Material landscape:</b> buildings, roads, farmland infrastructure, water conservancy facilities, rural industry, agricultural production, crops, and rural residents<br>· <b>Nonmaterial landscape:</b> rural lifestyle, rural production relations, rural environment, rural life, rural morality, rural aesthetics, rural wealth, rural customs, religious beliefs, rural production concept                                                                                                                                                                                                                                                                                    |
| Li [2]    | <b>Material system</b><br><b>Value system</b>                                                         | · <b>Material system:</b><br>Behavior: daily behavior, festival ceremony, traditional skills<br>Architecture: historical architecture, local architecture<br>Space: space composition, space form<br>Structure: spatial structure, landscape structure<br>Environment: landscape environment, pastoral scenery, green vegetation<br>· <b>Value system:</b><br>Habitat culture: local customs, life philosophy, life culture<br>Historical culture: historical evolution, historical events, historical figures<br>Industrial culture: industrial history, industrial development, industrial characteristics<br>Spiritual culture: cultural concept, aesthetic taste, spiritual belief |
| Liu [44]  | <b>Landscape features</b><br><b>Cultural features</b>                                                 | · <b>Landscape features:</b><br>Residential characteristics: quadrangle, tulou, dry fence, etc.<br>Totem sign<br>Main public buildings: ancestral temple, drum-tower, stone arch, bridge, etc.<br>Environmental factors: big banyan trees, water network, mountains, lakes, rivers, etc.<br>· <b>Cultural features:</b><br>Cultural features implied in ancient totems<br>Cultural features implied in folk art<br>Cultural features implicit in the traditional architectural landscape                                                                                                                                                                                               |
| Li [45]   | <b>Natural environment</b><br><b>Spatial form</b><br><b>Residential type</b><br><b>Social culture</b> | · <b>Natural environment:</b> landform, elevation, river grade, river relationship;<br>· <b>Spatial form:</b> settlement scale, settlement orientation, settlement form, street pattern;<br>· <b>Residential type:</b> residential type system, building materials, façade characteristics, decorative style, typical buildings;<br>· <b>Social and cultural aspects:</b> ethnicity (language/dialect), intangible cultural heritage                                                                                                                                                                                                                                                   |
| Long [46] | <b>People</b><br><b>Events</b><br><b>Places</b><br><b>Things</b>                                      | · <b>People</b><br>Elements: creator, owner, manager, user<br>Value connotation: social value and spiritual value<br>· <b>Events</b><br>Elements: functional behavior, ritual behavior, social behavior<br>Value connotation: economic value, technological value, spiritual value<br>· <b>Places</b><br>Elements: material attributes, spiritual attributes, institutional attributes<br>Value connotations: ecological value and aesthetic value<br>· <b>Things</b><br>Elements: fixed landscape elements, semifixed landscape elements, and nonfixed landscape elements<br>Value connotation: historical value, aesthetic value, spiritual value                                    |
| Li [47]   | <b>Natural background</b><br><b>Physical environment</b><br><b>Mental world</b>                       | · <b>Natural background:</b> the human land relationship of scene geography<br>· <b>Physical environment:</b> the spatial relationship between people and architecture<br>· <b>Mental world:</b> cultural interpretation of spirit anthropology                                                                                                                                                                                                                                                                                                                                                                                                                                        |

<https://doi.org/10.1371/journal.pone.0283335.t001>

screen the characteristic visual elements of the city, providing visual references for subsequent planning and construction [42].

In summary, the research on the perception of traditional settlement landscapes mainly focuses on the difference and evaluation of the perception of different subjects to enhance local identity and the attachment of local residents, improve the satisfaction with traditional settlement tourism, and guide the planning, design and construction of the cultural landscapes of traditional settlements.

## 2.2 Study on the constituent elements of the cultural landscapes of traditional settlements

According to the combination of materiality and immateriality of cultural landscapes and the characteristics of traditional settlements, scholars have analyzed the cultural landscape of traditional settlements and its constituent elements (Table 1).

## 2.3 Research on tourist perceptions based on web text

In the era of the network economy, various online media interaction platforms have been continuously used in the tourism field and have gained greater attention [48]. Tourism experience is often communicated and disseminated on these platforms [49]. Tourists can freely express and release their views, including travel notes, comments, strategies and other media on the internet [50,51]. Tourists explore and publicize their destinations in a "decentralized" way. Therefore, tourist perceptions of destinations no longer depend on traditional propaganda but on user-generated content (UGC), such as tourism virtual communities and media-related tourism [52,53]. The content of "decentralized" UGC includes not only words but also pictures, videos and other media forms, which are richer, more vivid and more realistic to reflect the tourism experience at the destination [54]. In recent years, scholars have made full use of social media data and emerging online textual analysis methods to study the perceived value and quality of tourism and its elements, structure and influencing factors [55,56]. This method can effectively avoid the shortcomings of collecting information through questionnaires and obtain more authentic ideas from tourists in their own words [57]. The research sample is collected online, which simplifies offline data processing procedures and lowers the threshold for researchers; qualitative research tools can also ensure the effectiveness of the research.

## 2.4 Review summary

According to the landscape intertextuality theory from the New Cultural Geography, different groups have different understandings of cultural landscapes, so it is necessary to study cultural landscape perception from the perspective of tourists to improve traditional settlement tourism planning. Cultural landscape perception is based on the research paradigm and methods of landscape perception, and the empirical research methods of psychology are widely used. With the development of VR technology, more empirical studies have constructed virtual scenes, but there are still differences between physical perception based on real scenes and virtual scene perception. Realistic perception research has certain advantages.

The purposes of the literature on cultural landscape perception are to explore spatial differences among cultural landscapes, differences in group perception, multi-dimensional significance and values, and factors affecting cultural landscape perception. In terms of research methods, social media data and online text analysis are widely used. These methods provide a methodological reference for this paper. In addition, a large number of research results are based on the types and characteristics of traditional village cultural landscapes from the

perspective of cultural geography scholars in previous studies, and these results are the basis of the perception research presented in this paper.

## 3 Methods

### 3.1 Research data

**3.1.1 Research object.** According to the official evaluation standard in China, traditional settlements include famous historical and cultural towns and villages in China as well as traditional villages. The evaluation of famous historical and cultural towns and villages in China began in 2003. The evaluation criteria include those towns and villages with rich cultural relics and great historical value or commemorative significance, which can fully reflect the traditional style and features of some historical periods or local ethnic characteristics. To date, seven batches have been selected, amounting to 312 famous historical and cultural towns and 487 famous historical and cultural villages [58]. The evaluation of traditional villages began in 2012. The evaluation criteria include those villages that have an early history, rich traditional resources, and certain historical, cultural, scientific, artistic, social, and economic values and should be protected. To date, five batches have been selected, amounting to 6823 traditional villages [59].

**3.1.2 Data source.** The popularity of the Internet makes it more convenient for tourists to record scenic spots, itineraries and feelings after visiting a location. "Online comments" can directly record the characteristics of tourist stops and describe the observations and feelings that occurred in response. The content related to cultural landscape perception is selected from the online comments from traditional settlement tourists as research data. This data acquisition method has the advantages of authenticity, universality, and accessibility, etc., and is reasoned and feasible. The online comment text is mainly from UGC-type websites. The daily ranking of domestic tourism websites is obtained through querying the Alexa ranking website, and Ctrip ([www.ctrip.com](http://www.ctrip.com)), which ranks first, is selected as the source of comment data. No specific permits were required for getting all the online comments data, as all the data from the website of Ctrip ([www.ctrip.com](http://www.ctrip.com)) did not involve human participants, human specimens or tissue, vertebrate animals or cephalopods, vertebrate embryos or tissues or field research. Further, there is no conflict of interest in the choice of data source, as all data comes from a public website ([www.ctrip.com](http://www.ctrip.com)) and is freely available to the public.

**3.1.3 Research sample.** Considering the efficiency and scientific nature of the research and focusing on the richness of the research sample, this study tries to screen samples that can provide high-density information for the research. This study follows the following principles in selecting research samples of traditional settlements: (1) typicality: qualifying traditional settlements are required to be typical of regional, geographical and cultural characteristics [60,61]. (2) Extensiveness: the selected samples cover the different types of traditional settlements in China as much as possible. (3) Nonspecific: the selected sample should be able to represent a certain type of settlement, rather than isolated examples. Considering the particularity of ethnic minority settlement culture, it is not included in the screening scope. (4) Nonoverlapping: only one sample is selected for traditional settlements of the same type. There are differences among samples, providing as much information as possible for the study. (5) Feasibility: The selected samples must be well represented in web-published comments, which can reflect enough common characteristics for researchers to analyze the content.

Based on the above 5 principles of sample selection and the number of comments on the Ctrip website, villages under the same circumstances and with more comments are selected to meet the needs of research and analysis. Finally, 21 traditional villages were selected from 6,823 research objects as the research sample (Table 2). This research sample represents the

Table 2. Research sample list.

| No.   | Name        | Province  | Geographical Environment                  | Cultural Characteristics                   | Comments |
|-------|-------------|-----------|-------------------------------------------|--------------------------------------------|----------|
| 1     | Cuandixia   | Beijing   | Central part of the canyon                | Traditional residence                      | 316      |
| 2     | Yangliuqing | Tianjin   | Plain                                     | Folk culture and art                       | 320      |
| 3     | Jimingyi    | Hebei     | Plain                                     | Historic Posthouse                         | 671      |
| 4     | Zhangbi     | Shanxi    | The Loess Plateau                         | Pocket military castle                     | 854      |
| 5     | Qinglong    | Shanxi    | Plain                                     | Military Town                              | 299      |
| 6     | Luxiang     | Jiangsu   | Back to the mountain and facing the water | Hall Buildings in Ming and Qing Dynasties  | 607      |
| 7     | Nianbadu    | Zhejiang  | Mountainous region                        | Cultural enclave                           | 1032     |
| 8     | Xinye       | Zhejiang  | Back to the mountain and facing the field | Clan culture                               | 428      |
| 9     | Tangmo      | Anhui     | Water reticulation plain                  | Shuikou Garden                             | 624      |
| 10    | Peitian     | Fujian    | Back to the mountain and facing the water | Hakka residential buildings                | 434      |
| 11    | Huangling   | Jiangxi   | Mountainous region                        | Mountain Village                           | 3429     |
| 12    | Zhuquan     | Shandong  | Back to the mountain and facing the water | Ecological Ancient Village                 | 2403     |
| 13    | Shedian     | Henan     | Plain                                     | Water land transit hub fortress            | 235      |
| 14    | Dayuwan     | Hubei     | Valley plain                              | Traditional residence                      | 267      |
| 15    | Zhangguying | Hunan     | Valley basin                              | Community of ancient residential buildings | 345      |
| 16    | Nanshe      | Guangdong | Region of rivers and lakes                | Guangfu Agricultural Settlement in Lingnan | 488      |
| 17    | Huangyao    | Guangxi   | Karst plain                               | Couplet culture                            | 2923     |
| 18    | Yangmei     | Guangxi   | Facing water                              | Ancient Commercial Town                    | 202      |
| 19    | Shangli     | Sichuan   | Back to the mountain and facing the water | Ancient road                               | 420      |
| 20    | Bingan      | Guizhou   | Mountainous region                        | Military and Commercial town               | 97       |
| 21    | Qingmuchuan | Shanxi    | River valley                              | Border Trade Town                          | 454      |
| Total |             |           |                                           |                                            | 16848    |

Note: The comment data are from January 2015 to February 2022.

<https://doi.org/10.1371/journal.pone.0283335.t002>

typical types of traditional Chinese villages, and the dataset contains enough comments on the Ctrip website to support data analysis.

**3.1.4 Data collection.** With the help of the free web crawling software "Octopus Collector", we collected tourist comment data about the 21 villages in the research sample on Ctrip ([www.ctrip.com](http://www.ctrip.com)). Since some traditional settlements have few comments on Ctrip before 2014, only qualified data submitted in or after January 2015 is included to unify the time period across all data. Since the data was collected for this article in March 2022, the latest comments date to February 2022. A total of 16848 comments were collected, and the text was preprocessed. Researchers quickly read all comments one by one, conducted preliminary screening, and deleted comments that did not conform to the research content. The following three types of comments are mainly deleted: pure scenic spot information; pure tourism strategies; and empty or overly simple descriptions. After preprocessing the comments, 3426 comments were deleted, and the remaining 13422 comments were used for data analysis.

### 3.2 Analysis methods

**3.2.1 Vocabulary segmentation and vocabulary frequency statistics.** ROSTCM6 software was used to conduct vocabulary segmentation and vocabulary frequency statistics on the massive database of tourist online comment texts about traditional settlements, high-frequency vocabulary words related to cultural landscapes were selected, relevant words and concepts such as the composition, connotation and value of cultural landscape of traditional settlements were identified if also mentioned in the relevant literature [62,63], and the core

element system was built for the perceptions of cultural landscapes in traditional settlements. This work laid a foundation for further analysis of semantic network structure.

**3.2.2 Semantic network analysis.** Through the statistical analysis of vocabulary segmentation and vocabulary frequency, we can determine the main features of the traditional settlement cultural landscape that tourists pay attention to and the cultural connotations and value that tourists perceive, but we do not know the relationship and relevance of these words to the perception process. This paper uses semantic network analysis to analyze the structural relationship of the core elements of cultural landscape perception [64]. A semantic network is a structure network diagram expressed by concepts and semantic relations. It consists of nodes and connections between nodes [65]. Nodes represent things, concepts, attributes, operations, states, etc., while lines represent semantic connections between connected nodes [66]. This paper constructs the semantic network of text according to the frequency of co-occurring words.

**3.2.3 Analysis of emotional tendency.** Emotional attitude analysis mainly analyzes the emotional nouns and adjectives used in the sample text and draws conclusions about the emotional tendency and perceptual attitude of tourists toward the cultural landscape of the traditional settlement. As an opinion, emotional tendency reflects tourists' perceived level of satisfaction with the cultural landscape in the traditional settlement. Emotional tendencies can be divided into positive and negative [67]. This paper first analyzes the overall emotional tendency of network text and further takes core elements of perception as key words to analyze the emotional tendency in this specific subset.

### 3.3 Research procedures

The specific research procedures of this paper are as follows: (1) With ROSTCM6 software, 13422 texts after preprocessing are segmented to extract high-frequency vocabulary related to the perception of the cultural landscape in the traditional settlement; (2) With reference to the relevant literature, the extracted high-frequency vocabulary of cultural landscape perception is used to construct a table of categories of perceptual elements in traditional settlements. (3) By using network analysis, the semantic network structure is constructed for the core elements of language used to describe perceptions of traditional settlement cultural landscapes; (4) ROST EA 1.9.0.4 is used to analyze the overall emotional tendency of tourists' perceptions of traditional settlement cultural landscape, as well as the emotional tendency around the core elements of perception. (5) According to the research results, this paper further analyzes the public perception of characteristics of the traditional settlement cultural landscape, public demands for the traditional landscape cultural landscape, and current shortcomings and puts forward countermeasures and suggestions for cultural landscape planning in traditional settlements.

## 4. Results

### 4.1 High-frequency vocabulary of traditional settlements cultural landscape perception

Through vocabulary segmentation and vocabulary frequency statistics on the online comment texts about traditional settlements, the high-frequency words describing characteristics of traditional settlement cultural landscapes are extracted (Table 3). The word-phrase "airing out farm goods in the autumn sun (shaiqiu)" has the highest frequency, reflecting that tourists have a strong perception of both visual aesthetic and agricultural characteristics in the cultural landscape. Second, there are words related to ornamental agricultural landscapes such as



Table 3. High-frequency vocabulary in traditional settlement culture perception.

| Ranking | High-Frequency vocabulary                | Frequency | Ranking | High-Frequency vocabulary      | Frequency |
|---------|------------------------------------------|-----------|---------|--------------------------------|-----------|
| 1       | Airing farm goods in the autumn sun      | 1121      | 26      | Stilted building               | 168       |
| 2       | Interesting                              | 816       | 27      | Memorial archways              | 164       |
| 3       | Experience                               | 776       | 28      | Huizhou                        | 157       |
| 4       | Canola flowers                           | 769       | 29      | Original ecology               | 152       |
| 5       | Feel                                     | 568       | 30      | Vacation                       | 148       |
| 6       | Quiet                                    | 476       | 31      | New Year pictures              | 147       |
| 7       | Natural                                  | 471       | 32      | Secluded                       | 143       |
| 8       | Fascinating                              | 457       | 33      | Simple and honest local people | 140       |
| 9       | Terrace                                  | 436       | 34      | Typical                        | 139       |
| 10      | Leisure                                  | 429       | 35      | Flagstone pavement             | 136       |
| 11      | Bamboo forest                            | 376       | 36      | Entertainment                  | 134       |
| 12      | Willow                                   | 364       | 37      | Brook                          | 128       |
| 13      | Anhui style                              | 335       | 38      | Spectacular                    | 121       |
| 14      | Historical culture                       | 307       | 39      | Quadrangle dwellings           | 106       |
| 15      | Enthusiasm                               | 280       | 40      | Creek                          | 106       |
| 16      | Peaceful                                 | 268       | 41      | Delightfully cool              | 104       |
| 17      | Rampart                                  | 255       | 42      | Water-bound country            | 103       |
| 18      | Pure and fresh                           | 243       | 43      | Vicissitudes                   | 103       |
| 19      | Ancestral temple                         | 197       | 44      | Cultural deposits              | 102       |
| 20      | Flowing water                            | 197       | 45      | Pleasantly cool                | 101       |
| 21      | Unique                                   | 191       | 46      | Well-proportioned              | 98        |
| 22      | Carefree                                 | 185       | 47      | Hakka                          | 94        |
| 23      | Enjoy                                    | 183       | 48      | Fresh                          | 94        |
| 24      | A stream in front and a hill at the back | 178       | 49      | Canal                          | 94        |
| 25      | Ancient tree                             | 173       | 50      | Ancient well                   | 93        |

Note: Due to limited space, only the top 50 high-frequency words are listed.

<https://doi.org/10.1371/journal.pone.0283335.t003>

"canola flowers", "terrace" and "willow". In addition, tourists also have a strong perception of the architecture of cultural landscapes such as historical buildings and structures such as "ramparts", "ancestral temples" and "memorial archways". Tourists have the highest perception of traditional settlement culture with words such as "original ecology" and "simple folk customs", reflecting the ecological culture and local culture of the settlement. The characteristic words with the highest frequency reflecting the degree of perception of the cultural value of traditional settlements include "fun", "leisure", "experience" and "feeling", which reflect the economic and educational value of tourism.

#### 4.2 Element system of cultural landscape perception in traditional settlements

On the basis of extracting high-frequency vocabulary, combined with relevant literature on traditional settlement cultural landscape research, high-frequency words related to traditional settlement cultural landscapes in online texts are classified into 47 subcategories and further grouped into three categories related to cultural landscapes: entity, connotation, and value. There are 36 subcategories under the category of cultural landscape entities, covering buildings, built environment, natural environment, customs, daily behaviors and historical texts. The connotations of the cultural landscape includes four subcategories: clan culture, human

settlement culture, farming-reading culture and rural culture. The value of cultural landscape covers seven subcategories: historical value, ecological value, spiritual value, artistic value, research value, educational value and economic value (Table 4).

### 4.3 Semantic networks of traditional settlement cultural landscape perception

In this paper, the high-frequency words in the web texts are replaced by the corresponding subcategory names. This process summarizes how many scattered high-frequency words are placed into corresponding subcategories to clearly show the core network relationship.

As shown in Fig 1, the value perception system is composed of artistic value, economic value, ecological value, historical value, research value and educational value. The core cultural landscape entities supporting these value perceptions include water bodies, settlement atmosphere, various architectural constructions, green vegetation, agroforestry fruit trees, architectural styles, production activities and sub core cultural landscape entities, including architectural communities, air and architectural decoration.

In this network structure, the seven subcategories for the value of traditional settlement cultural landscapes, except for spiritual value, are included, indicating that the value of settlement cultural landscapes is generally recognized. However, none of the cultural connotations contained in the cultural landscape are included in this structure, indicating that the cultural connotation characteristics are not significant enough to be effectively considered and perceived. In terms of cultural landscape entities, only 10 subcategories are included, accounting for 27.8% of the 36 entity subcategories. There is an obvious core edge structure in cultural landscape perception.

### 4.4 Emotional tendencies in traditional settlement culture landscape perception

The overall emotional tendencies of tourists' perception of the traditional settlement cultural landscape are analyzed by using the emotional analysis software ROST EA, as shown in Table 5.

Furthermore, 47 subcategories of traditional settlement cultural landscape perception were taken as keywords to analyze tourists' emotional tendencies. Table 6 shows the analysis results. It can be seen from the analysis results that the terms "settlement atmosphere" and "economic value" (65.71%) with the highest positive emotion are only 0.17% different from the terms with the least positive emotion: "geomantic architecture", "educational building", "former residence", "street scale", "dialect idiom", "traditional skills", "clan culture" and "rural culture" (65.54%). The "settlement atmosphere" with the lowest negative emotion (33.56%) is only 0.17% different from the terms with the least negative emotion: "geomantic architecture", "educational building", "former residence", "street pavement", "street scale", "dialect idiom", "traditional skills", "clan culture" and "rural culture" (33.73%). According to the analysis, the emotional tendencies across 47 subcategories of traditional settlement cultural landscape perception tend to converge significantly.

## 5. Discussion

### 5.1 Structural relationships in the perceptions of traditional settlement cultural landscapes

The vocabulary frequency analysis shows that there is a long tail in the distribution of high-frequency words in the perception of traditional settlement cultural landscapes; that is, a few

Table 4. Element system of cultural landscape perception in traditional settlements.

| Categories                | Subcategories                                                           | High-Frequency Vocabulary                                                                                                                                                                                                                                      |
|---------------------------|-------------------------------------------------------------------------|----------------------------------------------------------------------------------------------------------------------------------------------------------------------------------------------------------------------------------------------------------------|
| Cultural landscape entity | Construction                                                            | memorial archways, decorated archway, gatehouse, stele, glazed stele, rampart, stage, ancient bridge, stone bridge, covered bridge, drawbridge, a screen wall facing the gate of a house, screen wall, gazebo, long corridor, pavilion, waterwheel, stone mill |
|                           | Geomantic architecture                                                  | wenfeng tower, wenchang pavilion                                                                                                                                                                                                                               |
|                           | Ritual architecture                                                     | ancestral hall, ancestral temple                                                                                                                                                                                                                               |
|                           | Religious architecture                                                  | ancient temple, temple                                                                                                                                                                                                                                         |
|                           | Educational building                                                    | school                                                                                                                                                                                                                                                         |
|                           | Former residence                                                        | senior official residence, Huihe Hall, Prime Minister's house, Site of Guangxi Provincial Working Committee                                                                                                                                                    |
|                           | Commercial buildings                                                    | escort agency, Rong Shengkui, Shanshan Guild Hall                                                                                                                                                                                                              |
|                           | Architectural space                                                     | courtyard, yard, atrium, hall, lobby, well shape, wing room, quadrangle dwellings                                                                                                                                                                              |
|                           | Building structure                                                      | wood structure                                                                                                                                                                                                                                                 |
|                           | Architectural modeling                                                  | cornices, Ma Tau wall warts, steps, stone steps, ladder, stilted building, seats for beauties                                                                                                                                                                  |
|                           | Architectural decoration                                                | mural, color painting, pattern, stone carving, wood carving, carve patterns, engrave, enchase, brick carving, lantern, carved beams and painted rafters                                                                                                        |
|                           | Building material                                                       | stone, gray brick, gray tile, green tile, colored glaze, loess, pink walls and black tiles, white wall and black tile                                                                                                                                          |
|                           | Building technology                                                     | construction technology, exquisite technology and exquisite workmanship                                                                                                                                                                                        |
|                           | Architectural style                                                     | Hakka, Anhui style, Huizhou, Hui style, water-bound country, Lingnan style                                                                                                                                                                                     |
|                           | Open space                                                              | square                                                                                                                                                                                                                                                         |
|                           | Street pavement                                                         | flagstone pavement, cobblestone                                                                                                                                                                                                                                |
|                           | Street form                                                             | profound, long, looming in the distance, deep and serene, tortuous, meandering, winding                                                                                                                                                                        |
|                           | Street structure                                                        | crisscross, complex and mixed, lead in all directions                                                                                                                                                                                                          |
|                           | Street scale                                                            | narrow                                                                                                                                                                                                                                                         |
|                           | Architectural community                                                 | well-proportioned, row upon row of, tier upon tier, build along the mountain                                                                                                                                                                                   |
|                           | Space structure                                                         | fan-shaped, a stream in front and a hill at the back, well-formed                                                                                                                                                                                              |
|                           | Settlement atmosphere                                                   | quiet, peaceful, secluded, quiet and deep, tranquil, seclusion, calm                                                                                                                                                                                           |
|                           | Topographic features                                                    | surrounded by mountains, halfway up the mountain, on the cliff                                                                                                                                                                                                 |
|                           | Air                                                                     | pure and fresh, fresh, smoke from kitchen chimneys, delightfully cool, pleasantly cool, mist                                                                                                                                                                   |
|                           | Water body                                                              | pool, pond, creek, brook, flowing water, waterway, well, ancient well, Zuo river, canal, water gap                                                                                                                                                             |
|                           | Greening vegetation                                                     | ancient tree, big banyan tree, big tree, camphor, maple, yew, willow, lotus, cherry blossom, ginkgo, osmanthus, moss, green trees, wild flowers, chrysanthemum                                                                                                 |
|                           | Agroforestry fruit trees                                                | terrace, farmland, canola flowers, chrysanthemum morifolium, peach blossom, loquat, pear flower, orange tree, bamboo forest, apricot tree                                                                                                                      |
|                           | Written record                                                          | horizontal inscribed board, plaque, antithetical couplet, couplet hung on the pillars, pedigree of a clan                                                                                                                                                      |
|                           | Handicrafts                                                             | carving, paper cutting, lanterns, New Year's pictures, kites, wood carvings, leather-puppets, porcelain                                                                                                                                                        |
|                           | Commodity and Food                                                      | white jade square cake, gong cake, magnolia bud, walnut steamed bun, barrel fish, horseshoe powder, tofu flower, glutinous rice cake, snail powder, Huangyao fermented soybean, tofu, dada noodles                                                             |
|                           | Dialect idiom                                                           | dialect                                                                                                                                                                                                                                                        |
|                           | Daily life                                                              | washing vegetables, pickles, carefree, flavor of rural life                                                                                                                                                                                                    |
| Production activities     | airing farm goods in the autumn sun                                     |                                                                                                                                                                                                                                                                |
| Festival activities       | March 3rd Festival, Lantern Fair, Temple Fair                           |                                                                                                                                                                                                                                                                |
| Folk customs              | marriage custom, habitude                                               |                                                                                                                                                                                                                                                                |
| Traditional skills        | leather-puppet show, ancient drama, traditional opera, chicken fighting |                                                                                                                                                                                                                                                                |

(Continued)

Table 4. (Continued)

| Categories                     | Subcategories            | High-Frequency Vocabulary                                                                                                                                                 |
|--------------------------------|--------------------------|---------------------------------------------------------------------------------------------------------------------------------------------------------------------------|
| Cultural landscape connotation | Clan culture             | ancestor worship, clans, consanguinity, established practice, regulation                                                                                                  |
|                                | Human settlement culture | geomantic omen, constellation, theory that man is an integral part of nature                                                                                              |
|                                | Farming-reading culture  | cultural deposits, humanistic atmosphere, inspiring place producing outstanding and talented people                                                                       |
|                                | Rural culture            | Huizhou culture, local customs and practices, country flavor, simple and honest local people, simple and unadorned, good and honest, enthusiasm, hospitable, folk culture |
| Cultural landscape value       | Historical value         | historical culture, historical details, historical sense, heritage                                                                                                        |
|                                | Ecological value         | original ecology, ecology, natural                                                                                                                                        |
|                                | Spiritual value          | admiration, release of mood                                                                                                                                               |
|                                | Artistic value           | archaic rhyme, unpretentious, vicissitudes, elegant, refined, classical, spectacular, magnificent, grand, mysterious, local or native art or handicraft, classic works    |
|                                | Research value           | unique, distinctive, peculiar, rare, unique, matchless, save complete, typical, living fossil                                                                             |
|                                | Educational value        | learn, experience, feel, appreciate                                                                                                                                       |
|                                | Economic value           | fascinating, interesting, leisure, vacation, entertainment, enjoy                                                                                                         |

<https://doi.org/10.1371/journal.pone.0283335.t004>

words are used very frequently, while most words are used very infrequently. The analysis of the long tail distribution of high-frequency words shows that the public very frequently perceives the cultural landscape to embody rural, historical and natural characteristics and visual aesthetic effects. A series of personalized, refined and knowledgeable cultural landscapes are distributed in the tail.

Further analysis of the semantic network shows that there is a significant core–edge structure in the perception of traditional settlement cultural landscapes; that is, there are core

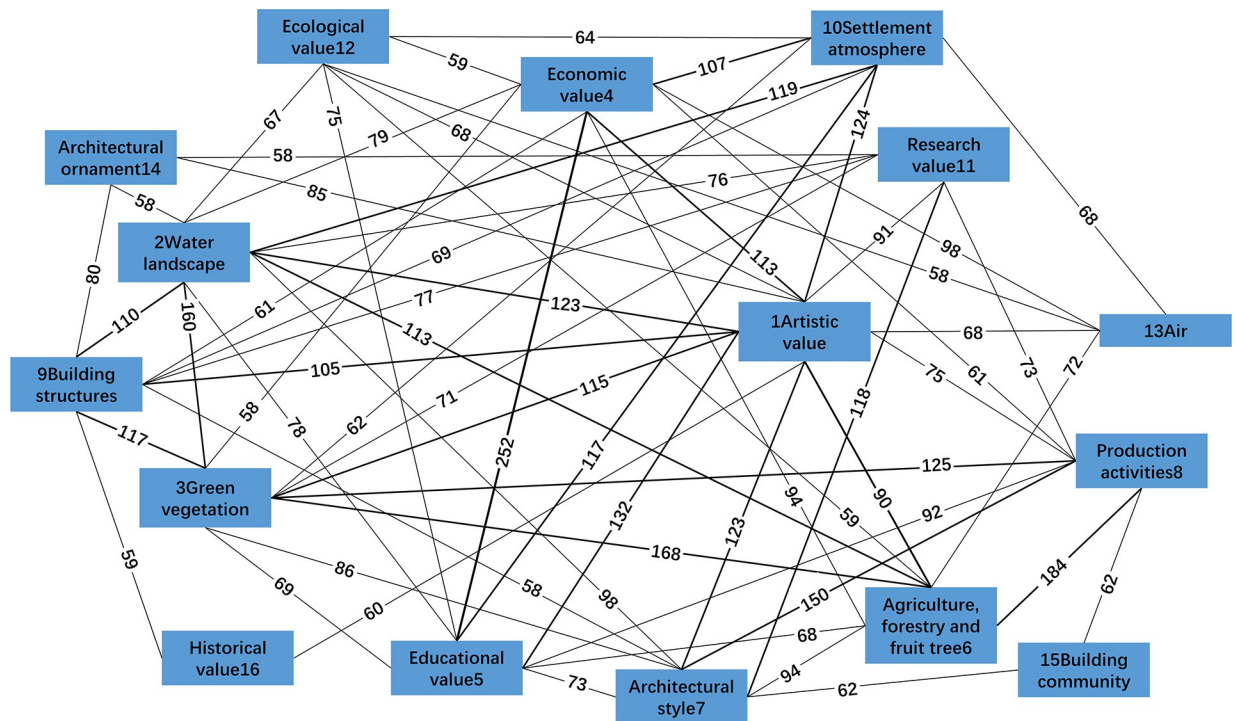

Fig 1. Semantic networks of traditional settlement cultural landscape perception.

<https://doi.org/10.1371/journal.pone.0283335.g001>

**Table 5. The general emotional tendencies in traditional settlement culture landscape perception.**

| Emotional Tendency | Positive Emotion | Neutral Emotion | Negative Emotion |
|--------------------|------------------|-----------------|------------------|
| Proportion         | 65.54%           | 0.73%           | 33.73%           |

<https://doi.org/10.1371/journal.pone.0283335.t005>

elements and edge elements in the perceptual elements of cultural landscapes. The perceptual frequency of core elements is high, and they are in the central position in the semantic network, closely related to other elements. In addition to the core elements, there are a large number of edge elements. Their perceptual frequency is low, and they are at the edge of the semantic relationship network or are not included in the network. Their relationship with other elements is weak, and the proportion of edge elements is much higher than that of the core elements. This indicates that tourists pay attention to and perceive only the specific and few cultural landscapes of traditional settlements and automatically ignore other cultural landscapes.

## 5.2 Emotional characteristics of perceptions of traditional settlement cultural landscapes

According to the analysis of emotional tendencies, the positive emotional tendency toward the cultural landscape is twice as frequent as the negative emotional tendency, and the neutral tendency accounts for a small proportion, indicating that the emotional tendency toward the cultural landscape of traditional settlements is generally positive, which indicates that the cultural landscape has played a positive role in the tourism development of traditional settlements.

Furthermore, cultural landscape perceptual elements are taken as the key words for emotional analysis. Research data show that tourists' emotional tendencies toward various elements have significantly converged, indicating that emotional tendencies are not subject to changes in response to cultural landscape element types. The emotional tendency of tourists comes from the comprehensive perception of all cultural landscapes.

In terms of emotional tendency, there is no obvious difference between different types of cultural landscapes. Therefore, it can be inferred that tourists have no special preference for specific types of cultural landscapes. The emotional differences mainly come from the characteristics of tourists themselves and the quality of the cultural landscapes.

## 5.3 Progressive levels in the perceptions of traditional settlement cultural landscapes

Semantic analysis was used to explore the progression of perceptions of traditional settlement cultural landscapes. According to the semantic features of high-frequency words in cultural landscape descriptions, these words can be classified into those related each to cultural landscape entity, cultural landscape connotation and cultural landscape value. In cognitive psychology, different schools hold different or even opposing views on the activity and dynamic mechanism of human perception. But in general, the three-stage cognitive process of "feeling-perception-cognition" is widely recognized [68]. Referring to the above theories, this paper divides the chronological relationship of traditional settlement cultural landscape perception into three progressive levels: the perception of cultural landscape as an entity, the recognition of the connotations of the cultural landscape, and the judgment of the value of the cultural landscape.

The sensation of cultural landscape entities not only comes from vision but also includes elements of the cultural landscape acquired by hearing, taste, smell and other senses, such as dialect idioms, food, air, etc. The cultural connotation contained in these cultural landscape

Table 6. The emotional tendencies of 47 perceptual subcategories of traditional settlement cultural landscapes.

| 47 Subcategories         | Positive Emotion | Neutral Emotion | Negative Emotion |
|--------------------------|------------------|-----------------|------------------|
| Settlement atmosphere    | 65.71%           | 0.73%           | 33.56%           |
| Economic value           | 65.71%           | 0.71%           | 33.58%           |
| Water body               | 65.67%           | 0.68%           | 33.65%           |
| Artistic value           | 65.66%           | 0.72%           | 33.62%           |
| Air                      | 65.65%           | 0.72%           | 33.63%           |
| Construction             | 65.63%           | 0.70%           | 33.67%           |
| Production activities    | 65.63%           | 0.71%           | 33.66%           |
| Educational value        | 65.62%           | 0.72%           | 33.66%           |
| Architectural modeling   | 65.61%           | 0.69%           | 33.70%           |
| Architectural style      | 65.61%           | 0.72%           | 33.67%           |
| Green vegetation         | 65.61%           | 0.72%           | 33.67%           |
| Architectural decoration | 65.60%           | 0.73%           | 33.67%           |
| Space structure          | 65.60%           | 0.70%           | 33.70%           |
| Agroforestry fruit trees | 65.60%           | 0.73%           | 33.67%           |
| Historical value         | 65.60%           | 0.72%           | 33.68%           |
| Ritual architecture      | 65.59%           | 0.73%           | 33.68%           |
| Architectural space      | 65.59%           | 0.72%           | 33.69%           |
| Building material        | 65.58%           | 0.70%           | 33.72%           |
| Architectural community  | 65.58%           | 0.73%           | 33.69%           |
| Daily life               | 65.58%           | 0.72%           | 33.70%           |
| Farming-reading culture  | 65.58%           | 0.73%           | 33.69%           |
| Research value           | 65.58%           | 0.73%           | 33.69%           |
| Topographic features     | 65.57%           | 0.73%           | 33.70%           |
| Commodity and Food       | 65.57%           | 0.73%           | 33.70%           |
| Ecological value         | 65.57%           | 0.73%           | 33.70%           |
| Religious architecture   | 65.56%           | 0.73%           | 33.71%           |
| Commercial buildings     | 65.56%           | 0.73%           | 33.71%           |
| Building technology      | 65.56%           | 0.73%           | 33.71%           |
| Street form              | 65.56%           | 0.73%           | 33.71%           |
| Handicrafts              | 65.56%           | 0.72%           | 33.72%           |
| Human settlement culture | 65.56%           | 0.73%           | 33.71%           |
| Building structure       | 65.55%           | 0.73%           | 33.72%           |
| Open space               | 65.55%           | 0.73%           | 33.72%           |
| Street pavement          | 65.55%           | 0.72%           | 33.73%           |
| Street structure         | 65.55%           | 0.73%           | 33.72%           |
| Written record           | 65.55%           | 0.73%           | 33.72%           |
| Festival activities      | 65.55%           | 0.73%           | 33.72%           |
| Folk customs             | 65.55%           | 0.73%           | 33.72%           |
| Spiritual value          | 65.55%           | 0.73%           | 33.72%           |
| Geomantic architecture   | 65.54%           | 0.73%           | 33.73%           |
| Educational building     | 65.54%           | 0.73%           | 33.73%           |
| Former residence         | 65.54%           | 0.73%           | 33.73%           |
| Street scale             | 65.54%           | 0.73%           | 33.73%           |
| Dialect idiom            | 65.54%           | 0.73%           | 33.73%           |
| Traditional skills       | 65.54%           | 0.73%           | 33.73%           |
| Clan culture             | 65.54%           | 0.73%           | 33.73%           |
| Rural culture            | 65.54%           | 0.73%           | 33.73%           |

<https://doi.org/10.1371/journal.pone.0283335.t006>

entities is interpreted and perceived by tourists to form a perception of cultural connotation, including clan culture, human settlement culture, farming culture and local culture, and further deduce and judge the value of cultural landscape, including historical value, ecological value, spiritual value, artistic value and other direct values, as well as research value, educational value and economic value based on development and utilization. The above three levels reveal the progressive process of perceiving traditional settlement cultural landscapes, which provides an effective analytical framework and research content for researchers to recognize the contours of the traditional settlement cultural landscape.

The perception of the value of the cultural landscape mainly focuses on the subjective value of the perceiver, such as economic and educational value, while the perception of its objective value is weak. In addition, although the cultural landscape resources are rich and the public has a good perception of cultural landscape entities, the public's perception of the cultural connotations in the traditional settlement cultural landscape is very weak. However, the high degree of recognition of the value of the cultural landscape shows that traditional settlement culture has the potential for inheritance, innovation and development.

In general, the public does not understand the history and culture of the traditional settlement cultural landscape, so we should develop the "soft" content of the cultural landscape and conduct in-depth research and exploration on its cultural connotations and historical change. Publicize the background knowledge and cultural connotations of the traditional settlement cultural landscape and let the public know more about the cultural connotations of the cultural landscape through social media promotion and folk custom activity planning, etc. The public's awareness of the cultural landscape of traditional settlements can be improved along with the public's awareness of the need to protect traditional settlements and the public can be guided to participate in the protection and inheritance of "traditional settlements".

## 6. Conclusion

This study constructed the core elements of the cultural landscape from the perspective of the public and analyzed the network structure of the core semantic elements and the emotional tendencies based on online comments from tourists and related documents on traditional settlement cultural landscapes. This study makes two contributions. In terms of theory, it provides a framework and reference for further understanding the connotations and values of the cultural landscape of the traditional settlement from the perspective of the public and supports policy-makers seeking to protect and develop traditional settlements. In practice, it helps traditional settlement administrators understand the key assets and potential opportunities for the protection and utilization of cultural landscape resources.

In the planning of cultural landscapes, not only is the physical planning, or "hardware", important, so is the integration of cultural connotations, or "software", into the cultural landscapes. Sufficient historical and cultural background knowledge is a necessary condition to enhance the public's sensitivity to cultural landscapes. On the basis of the presentation of cultural landscape entities, "software" such as historical and cultural background knowledge can be displayed and publicized. In addition to the traditionally static physical reality, virtual reality can also be used to organically present this combined programming of "software" and "hardware" of the cultural landscape. In cultural landscape planning, we should fully tap the resources embodied in the characteristics of traditional settlements, organize cultural landscapes with similar connotations into a series of connected landscapes, highlight their shared characteristics and themes, and enhance the perceptibility of cultural connotations. The spatial planning of the cultural landscape uses culture as the organizing principle for the design of the tour route through the landscape. A series of landscapes with clear cultural themes is a

convenient means of public education to identify cultural connotations, providing a good foundation for the protection and inheritance of cultural landscapes.

However, this study also has some limitations. First, the research data do not cover tourists who do not use the internet, including some elderly tourists. Second, the data used in this study are mainly web text comments. In reality, many tourists use photos or videos to express themselves. We will enrich the information sources in subsequent research. Third, the cultural landscape of traditional settlements is a complex cultural construction. The quantitative analysis of big data alone cannot fully tap the cultural landscape resources and cultural connotation. Qualitative research methods (such as interviews) should be added to follow-up research to enhance the depth of the research into cultural landscapes. Finally, these data come from the web and do not involve basic demographic information, such as age and gender. In the future, it will be possible to investigate the differences and diversity of cultural landscape perception in combination with the demographic characteristics of tourists.

## Supporting information

**S1 Dataset. Original online comment data.**

(XLSX)

**S2 Dataset. Valid data after deleting invalid online comments.**

(XLSX)

## Author Contributions

**Conceptualization:** Jingjing Zhou, Xiaojing Wu.

**Data curation:** Jingjing Zhou, Xiumin Xia.

**Formal analysis:** Xiumin Xia.

**Funding acquisition:** Jingjing Zhou, Shanshan Wu, Xiumin Xia.

**Investigation:** Xiumin Xia.

**Methodology:** Jingjing Zhou, Shanshan Wu.

**Project administration:** Xiumin Xia.

**Resources:** Jingjing Zhou, Xiumin Xia.

**Software:** Jingjing Zhou, Shanshan Wu.

**Supervision:** Xiumin Xia.

**Validation:** Xiaojing Wu, Xiumin Xia.

**Visualization:** Shanshan Wu.

**Writing – original draft:** Jingjing Zhou.

**Writing – review & editing:** Jingjing Zhou, Shanshan Wu.

## References

1. Gunawan A, Edison FM, Mugnisjah WQ, Utami F. *INDONESIAN CULTURAL LANDSCAPE DIVERSITY: CULTURE-BASED LANDSCAPE ELEMENTS OF MINANGKABAU TRADITIONAL SETTLEMENT*. *INT J CONSERV SCI*. 2019 2019-1-1; 10(4):701–10.
2. Li H, Jing X. *Analysis on the Types and Composing of Cultural Landscapes of China*. *Chinese Landscape Architecture*. 2009; 25(2):90–4.



3. Atik D, Erdogan N. Socio-Cultural and Physical Transformation of Edirne Citadel Traditional Settlement. In: Erdogan N, editor *URBAN TRANSFORMATION: ECONOMIC, SOCIAL AND PHYSICAL ASPECTS*. 1st International Urban Planning-Architecture-Design Congress (UPAD2014); 2014. p. 59–69.
4. Markuszewska I. SENTIMENTALITY VERSUS TRANSFORMATION OF THE HISTORICAL TRADITIONAL RURAL LANDSCAPE (A CASE STUDY: THE LANDSCAPE OF DUTCH LAW SETTLEMENT IN POLAND). *QUAEST GEOGR*. 2019 2019-1-1; 38(1):53–70.
5. Tsilimigkas G, Dardemezi ET. Spatial Planning and the Traditional Settlements Management: Evidence from Visibility Analysis of Traditional Settlements in Cyclades, Greece. *Planning Practice & Research*. 2020 2020-1-1; 35(1):86–106.
6. Harun NZ, Jaffar N. Enhancement for Rural Livability: Changes and impacts on the traditional Malay settlement. *ENVIRONMENT-BEHAVIOUR PROCEEDINGS JOURNAL*. 4th Association-of-Behavioural-Researchers-on-Asians (ABRA) International Conference on Quality of Life (AQoL); 2018. p. 127–34.
7. Markuszewska I. SENTIMENTALITY VERSUS TRANSFORMATION OF THE HISTORICAL TRADITIONAL RURAL LANDSCAPE (A CASE STUDY: THE LANDSCAPE OF DUTCH LAW SETTLEMENT IN POLAND). *QUAEST GEOGR*. 2019 2019-1-1; 38(1):53–70.
8. Setijanti P, Defiana I, Setyawan W, Silas J, Firmaningtyas S, Ernawati R. Traditional Settlement Livability in Creating Sustainable Living. *Procedia—Social and Behavioral Sciences*. 2015 2015-1-1; 179:204–11.
9. Guo Z, Sun L. The planning, development and management of tourism: The case of Dangjia, an ancient village in China. *TOURISM MANAGE*. 2016; 56:52–62.
10. Gavrilă-Paven I. Tourism Opportunities for Valorizing the Authentic Traditional Rural Space—Study Case: Ampoi And Mures Valleys Microregion, Alba County, Romania. *Procedia—Social and Behavioral Sciences*. 2015 2015-1-1; 188:111–5.
11. Hwang J, Lee S. The effect of the rural tourism policy on non-farm income in South Korea. *TOURISM MANAGE*. 2015 2015-1-1; 46:501–13.
12. Yang J, Yang R, Chen MH, Su J, Xi J. Effects of rural revitalization on rural tourism. *J HOSP TOUR MANAG*. 2021; 47(4):35–45.
13. Sj A, Jya B, Ew B, Ji C. The influence of high-speed rail on ice–snow tourism in northeastern China—ScienceDirect. *TOURISM MANAGE*. 2020; 78.
14. Quintana M, Fons M, Gregory RB. Cultural landscapes as images of destination: perception and valuation as tourist product. *PASOS*. 2018 2018-1-1; 16(4):873–87.
15. Yang WL, Fan B, Tan JB, Lin J, Shao T. The Spatial Perception and Spatial Feature of Rural Cultural Landscape in the Context of Rural Tourism. *SUSTAINABILITY-BASEL*. 2022 2022-1-1; 14(7).
16. Belias D, Vasiliadis L, Zafitis E. The Impact of Cultural Routes on Traditional Settlements: The Case of Greece. In: Katsoni V, Spyriadis T, ^editors. *CULTURAL AND TOURISM INNOVATION IN THE DIGITAL ERA*. 6th International Conference of the International-Association-of-Cultural-and-Digital-Tourism (IACuDiT)—Cultural and Tourism Innovation—Integration and Digital Transition; 2020. p. 123–34.
17. Santoro A, Venturi M, Agnoletti M. Landscape Perception and Public Participation for the Conservation and Valorization of Cultural Landscapes: The Case of the Cinque Terre and Porto Venere UNESCO Site. *LAND-BASEL*. 2021 2021-1-1; 10(2).
18. ZUBE EH PITT DG. CROSS-CULTURAL PERCEPTIONS OF SCENIC AND HERITAGE LANDSCAPES. *LANDSCAPE PLANNING*. 1981 1981-1-1; 8(1):69–87.
19. Herzog TR, Herbert EJ, Kaplan R, Crooks CL. Cultural and developmental comparisons of landscape perceptions and preferences. *ENVIRON BEHAV*. 2000 2000-1-1; 32(3):323–46.
20. Ozdemir A. Cultural heritage readability: Children’s perception of cultural landscape, Laodikeia Ancient City, Denizli. *KASTAMONU UNIV J FOR*. 2018 2018-1-1; 18(1):32–45.
21. Gao Y, Zhang T, Zhang W, Meng H, Zhang Z. Research on Visual Behavior Characteristics and Cognitive Evaluation of Different Types of Forest Landscape Spaces. *URBAN FOR URBAN GREE*. 2020; 54:126788.
22. Tully G, Piai C, Rodriguez-Hernandez J, Delhommeau E. Understanding Perceptions of Cultural Landscapes in Europe: A Comparative Analysis Using ‘Oppida’ Landscapes. *HIST ENVIRON POLICY*. 2019 2019-1-1; 10(2):198–223.
23. Bidegain I, Lopez-Santiago CA, Gonzalez JA, Martinez-Sastre R, Ravera F, Cerda C. Social Valuation of Mediterranean Cultural Landscapes: Exploring Landscape Preferences and Ecosystem Services Perceptions through a Visual Approach. *LAND-BASEL*. 2020 2020-1-1; 9(10).
24. Gorelova J, Khilko N. Cultural Landscapes Photographic Images in Character of Perception and Methods of Mass and Professional Media Education. *MEDIA EDUC-RUSS*. 2021 2021-1-1(2):255–66.

25. Dupont L, Antrop M, Eetvelde VV. Eye-tracking Analysis in Landscape Perception Research: Influence of Photograph Properties and Landscape Characteristics. *LANDSCAPE RES.* 2014; 39(4):417–32.
26. Goldman A, de Vignemont F. Is social cognition embodied? *TRENDS COGN SCI.* 2009 2009-1-1; 13(4):154–9. <https://doi.org/10.1016/j.tics.2009.01.007> PMID: 19269881
27. Foglia L, Wilson RA. Embodied cognition. *WIRES COGN SCI.* 2013 2013-1-1; 4(3):319–25. <https://doi.org/10.1002/wcs.1226> PMID: 26304209
28. Cifric I, Trako T. Comparison of perception of natural and cultural landscapes in Croatia. The use of semantic differential. *Socijalna Ekologija.* 2008; 17(4):379–403.
29. Bidegain I, López-Santiago CA, González JA, Martínez-Sastre R, Ravera F, Cerda C. Social Valuation of Mediterranean Cultural Landscapes: Exploring Landscape Preferences and Ecosystem Services Perceptions through a Visual Approach. *LAND-BASEL.* 2020; 9.
30. Li Y, Ye Y, Xiao LZ, Xu WT, Law A, Wang D. Classifying community space at a historic site through cognitive mapping and GPS tracking: The case of Gulangyu, China. *URBAN DES INT.* 2017 2017-1-1; 22(2):127–49.
31. Zheng J, Bai XF, Wu ZR, Zhang SY, Zhang TT, Wang H. Research on the spatial behavior conflict in suburban village communities based on GPS tracking and cognitive mapping. *J ASIAN ARCHIT BUILD.* 2022(2):2605–20.
32. Tieskens KF, Zanten B, Schulp C, Verburg PH. Aesthetic appreciation of the cultural landscape through social media: An analysis of revealed preference in the Dutch river landscape. *LANDSCAPE URBAN PLAN.* 2018; 117:128–37.
33. Rogatka K, Chodkowska-Miszczuk J, Bieganska J, Grzelak-Kostulska E, Sroda-Murawska S. PERCEPTION OF THE CULTURAL LANDSCAPE RELATED TO WIND PARKS—GENERATION Y PERSPECTIVE. *MITT OSTERR GEOGR G.* 2017 2017-1-1; 159:131–49.
34. Daugstad K. Negotiating landscape in rural tourism. *ANN TOURISM RES.* 2008; 35(2):402–26.
35. Stephenson JR. Values in space and time: a framework for understanding and linking multiple cultural values in landscapes: a thesis submitted for the degree of Doctor of Philosophy at the University of Otago, Dunedin, New Zealand /. 2013.
36. Li B, Yang J, Liu P. Landscape Value Perception and Evaluation of Residents on Traditional Villages—A Case Study of Zhangguying Village. *Journal of Central China Normal University (Nat. Sci).* 2018; 52(2):248–55.
37. Chen H. Research on Landscape Perception Evaluation of Traditional Villages—A Case of Liu Jia-qiao Village in Xianning, Hubei. *Urban Architecture.* 2020; 17(13):12–7.
38. Beeho AJ, Prentice RC. Conceptualizing the experiences of heritage tourists: A case study of New Lanark World Heritage Village. *TOURISM MANAGE.* 1997.
39. Zeppel H. Cultural Tourism at the Cowichan Native Village, British Columbia. *J TRAVEL RES.* 2002; 41(1):92–100.
40. Lin Z, Zhang J, Liu B. Landscape Context Perception Value of Traditional Village: A Study Based on Tourist Behavior Preference. *Chinese Landscape Architecture.* 2017(08):98–102.
41. Yang L. A Study on the Tourism Perception of the Agricultural Cultural Landscape of Longji Terraces Based on Networktext Analysis: Guilin university of technology; 2018.
42. Yuan M, Gao J, Wang J. Initial Exploration on Visual Perception of Historical and Cultural Landscape of Pingyao Ancient City. *Housing Science.* 2020; 40(05):64–8.
43. Zhao X. Research to the Protection of Traditional Rural Cultural Landscape—Take the Ancient Town of Longmen as the Example: Central South University of Forestry & Technology; 2008.
44. Liu P. On Construction and Utilization of Chinese Traditional Settlements Landscape's Genetic Map: Peking University; 2011.
45. Li J, Yang D, Xiao D. A Quantitative Study on the Cultural Landscape Division of the Traditional Settlements and Vernacular Dwellings in Hainan Island. *Development of Small Cities and Towns.* 2020; 38(05):39–48.
46. Long B, Zhang J. A Study on the Component Elements and Evolutionary Mechanism of Chinese Traditional Village Landscape Heritage: Case Studies in the Southeast of Chongqing. *NEW ARCHITECTURE.* 2020(04):128–33.
47. Li T, Zhai H, Hu K. Scenes, People, and Spirit—Study on the Protection of Traditional Villages in Shangri-La from the Perspective of Cultural Landscape. *Chinese Landscape Architecture.* 2020; 36(01):37–42.
48. Mudambi SM, Schuff D. What Makes a Helpful Review? A Study of Customer Reviews on Amazon.com. *MIS QUART.* 2010; 34(1) March:185–200.

49. Lin P, Chen L, Luo Z. Analysis of Tourism Experience in Haizhu National Wetland Park Based on Web Text. *SUSTAINABILITY-BASEL*. 2022 2022-1-1; 14(5).
50. Wood SA, Guerry AD, Silver JM, Lacayo M. Using social media to quantify nature-based tourism and recreation. *SCI REP-UK*. 2013 2013-1-1; 3(1):2976. <https://doi.org/10.1038/srep02976> PMID: 24131963
51. De Hoog R, Bronner F. Travel websites: Changing visits, evaluations and posts. *Annals of tourism research: A social sciences journal*. 2016; 57(Mar.):94–112.
52. Yuan C, Kong X, Li L, Li Y. Traditional Village Image Perception Research Based on Tourist UGC Data: A Case of Chengkan Village. *ECON GEOGR*. 2020(8):203–11.
53. Zhang K, Li C, Zhang J. A Study on the Spatio-temporal Evolution of Inbound Tourists' Perceptions and Behaviors Based on Big Pictorial Data: The Case of Beijing. *Tourism Tribune*. 2020(8):61–70.
54. Chen SY, Meng B, Liu N, Qi ZY, Liu J, Wang J. Cultural Perception of the Historical and Cultural Blocks of Beijing Based on Weibo Photos. *LAND-BASEL*. 2022 2022-1-1; 11(4).
55. Zhang K, Chen Y, Li C. Discovering the tourists' behaviors and perceptions in a tourism destination by analyzing photos' visual content with a computer deep learning model: The case of Beijing. *TOURISM MANAGE*. 2019; 75(Dec.):595–608.
56. Duverger P. Curvilinear Effects of User-Generated Content on Hotels' Market Share: A Dynamic Panel-Data Analysis. *Journal of Travel Research*. 2013(52):465–78.
57. Zhou J. Research on the Cultural Perception of Traditional Settlements and the Application in Cultural Space Planning: Zhejiang University; 2022.
58. Ministry of Construction of the People's Republic of China, State Administration of Cultural Relics of China [Internet]. Beijing: Government apparatus; c2023 [cited 2023 Jan 23]. Available from: [https://baike.baidu.com/item/%E4%B8%AD%E5%9B%BD%E5%8E%86%E5%8F%B2%E6%96%87%E5%8C%96%E5%90%8D%E9%95%87%E5%90%8D%E6%9D%91?fromModule=lemma\\_search-box](https://baike.baidu.com/item/%E4%B8%AD%E5%9B%BD%E5%8E%86%E5%8F%B2%E6%96%87%E5%8C%96%E5%90%8D%E9%95%87%E5%90%8D%E6%9D%91?fromModule=lemma_search-box).
59. Expert Committee on the Protection and Development of Traditional Villages [Internet]. Tianjin: Expert Committee; c2023 [cited 2023 Jan 22]. Available from: <http://www.chuantongcunluo.com/>.
60. Peng Y. Analysis on the Landscape of Traditional Villages and Towns. Beijing: China Architecture & Building Press; 1992.
61. Hu Z, Strobl J, Min Q, Tan M, Chen F. Visualizing the cultural landscape gene of traditional settlements in China: a semiotic perspective. *HERIT SCI*. 2021 2021-1-1; 9(1).
62. Zhan Y, Wu J, Du H. Researching on Satisfaction of Tibetan Characteristic Agricultural Products Based on Consumer Comment from Jingdong Mall—Taking the Example of highland barley rice. In: Yue XG, McAleer M, Bwalya KJ, ^editors. *ISBDAL '18: PROCEEDINGS OF THE INTERNATIONAL SYMPOSIUM ON BIG DATA AND ARTIFICIAL INTELLIGENCE*. International Symposium on Big Data and Artificial Intelligence (ISBDAL); 2018. p. 29–32.
63. Chen W, Yang TN, Lai LY, IEEE. Research on Maker Space Policy Expression Based on Co-Word Analysis. 2020 IEEE CONFERENCE ON TELECOMMUNICATIONS, OPTICS AND COMPUTER SCIENCE (TOCS). IEEE Conference on Telecommunications, Optics and Computer Science (TOCS); 2020. p. 29–34.
64. Bayrakdar S, Yucedag I, Simsek M, Dogru IA. Semantic analysis on social networks: A survey. *INT J COMMUN SYST*. 2020 2020-1-1; 33(11).
65. Wang L, Hu GL, Zhou TH. Semantic Analysis of Learners' Emotional Tendencies on Online MOOC Education. *SUSTAINABILITY-BASEL*. 2018 2018-1-1; 10(6).
66. Drieger P. Semantic Network Analysis as a Method for Visual Text Analytics. In: Fischer M, editor *9TH CONFERENCE ON APPLICATIONS OF SOCIAL NETWORK ANALYSIS (ASNA)*. 9th Conference on Applications of Social Network Analysis (ASNA); 2013. p. 4–17.
67. Habibi R, Setyohadi DB, Santoso KI. Student Learning Styles and Emotional Tendencies Detection Based on Twitter. In: Facta M, Riyadi MA, Prasetyo AB, Widiyanto ED, Eridani D, ^editors. *2017 4TH INTERNATIONAL CONFERENCE ON INFORMATION TECHNOLOGY, COMPUTER, AND ELECTRICAL ENGINEERING (ICITACEE)*. 4th International Conference on Information Technology, Computer, and Electrical Engineering (ICITACEE); 2017. p. 239–43.
68. Robert L. Solso, Otto H. MacLin, M. Kimberly MacLin. *Cognitive Psychology*. 8th ed. Boston: Allyn & Bacon; 2007.
